# Supplementary material for: Plasma and Urinary Biomarkers Improve Prediction of Mortality through 1 Year in Intensive Care Patients: An Analysis from FROG-ICU
Source: MDPI journal article supplement (doi:10.3390/jcm12093311), 2023-05-06

## **Supplementary material**

### **Plasma and Urinary Biomarkers Improve Prediction of Mortality through 1 Year in Intensive Care Patients: An Analysis from FROG-ICU**

Beth A. Davison, Christopher Edwards, Gad Cotter, Antoine Kimmoun, Étienne Gayat, Agnieszka Latosinska,  
Harald Mischak, Koji Takagi, Benjamin Deniau, Adrien Picod, Alexandre Mebazaa

#### Table of Contents

|                                                                                                                                                                                          |   |
|------------------------------------------------------------------------------------------------------------------------------------------------------------------------------------------|---|
| Table S1a. Continuous covariates considered for inclusion in the prognostic models. ....                                                                                                 | 2 |
| Table S1b. Categorical variables considered for inclusion in the prognostic models.....                                                                                                  | 4 |
| Table S2. Centrally measured biomarkers at study inclusion considered in prognostic models. ....                                                                                         | 7 |
| Figure S1. Calibration Plots for Multivariable Logistic Regression and Cox Proportional Hazards Models<br>for A) In-ICU Mortality, B) In-Hospital Mortality, and C) 1-Year Survival..... | 8 |
| Figure S2. Receiver Operating Characteristic Curves for Multivariable Logistic Regression Models for A)<br>In-ICU Mortality, B) In-Hospital Mortality, and C) 1-Year Survival .....      | 9 |

**Table S1a. Continuous covariates considered for inclusion in the prognostic models.**

|                                                   | <b>N</b> | <b>Missing (%)</b> | <b>Mean</b> | <b>SD</b> | <b>Min</b> | <b>Q1</b> | <b>Median</b> | <b>Q3</b> | <b>Max</b> |
|---------------------------------------------------|----------|--------------------|-------------|-----------|------------|-----------|---------------|-----------|------------|
| <b>Demographics</b>                               |          |                    |             |           |            |           |               |           |            |
| Age (year)                                        | 2087     | 0.0                | 61          | 16        | 18         | 51        | 63            | 74        | 98         |
| <b>Vitals at Inclusion</b>                        |          |                    |             |           |            |           |               |           |            |
| Systolic BP (mmHg)                                | 2037     | 2.4                | 124         | 23        | 40         | 108       | 122           | 139       | 220        |
| Diastolic BP (mmHg)                               | 1967     | 5.7                | 63          | 14        | 10         | 53        | 61            | 70        | 149        |
| Heart Rate (bpm)                                  | 2009     | 3.7                | 93          | 21        | 42         | 78        | 92            | 106       | 190        |
| Respiratory Rate (/min)                           | 1546     | 25.9               | 21          | 7         | 8          | 16        | 20            | 25        | 51         |
| Temperature (Celsius)                             | 2040     | 2.3                | 37.2        | 1.0       | 27.0       | 36.7      | 37.2          | 37.8      | 40.9       |
| Oxygen Saturation (%)                             | 1976     | 5.3                | 97          | 3         | 70         | 96        | 98            | 100       | 100        |
| Weight (Kg)                                       | 1750     | 16.1               | 79          | 19        | 30         | 65        | 78            | 90        | 212        |
| Positive End-Expiratory Pressure (cmH2O)          | 1843     | 11.7               | 6           | 3         | 1          | 5         | 5             | 8         | 28         |
| Expired volume (ml)                               | 1558     | 25.3               | 484         | 118       | 60         | 410       | 470           | 534       | 1000       |
| Fraction of inspired oxygen (%)                   | 1920     | 8.0                | 43          | 17        | 21         | 30        | 40            | 50        | 100        |
| PaO2/FiO2 Ratio                                   | 1770     | 15.2               | 224.8       | 140.9     | 2.0        | 123.3     | 220.0         | 316.7     | 709.5      |
| Partial pressure of carbon dioxide (mmHg)         | 1894     | 9.2                | 39          | 9         | 20         | 34        | 38            | 43        | 126        |
| Partial pressure of oxygen (mmHg)                 | 1912     | 8.4                | 106         | 53        | 30         | 76        | 92            | 120       | 600        |
| <b>Local Laboratory at Inclusion</b>              |          |                    |             |           |            |           |               |           |            |
| White blood cell count (/mm3)                     | 1938     | 7.1                | 12374       | 7496      | 500        | 7600      | 10900         | 16100     | 65100      |
| Hemoglobin (g/dL)                                 | 1983     | 5.0                | 10.2        | 1.9       | 3.4        | 8.9       | 10.0          | 11.4      | 19.9       |
| Platelets (/mm3)                                  | 1958     | 6.2                | 185750      | 120760    | 3000       | 99000     | 164000        | 243000    | 860000     |
| Total protein (g/L)                               | 1835     | 12.1               | 54          | 10        | 20         | 48        | 54            | 60        | 112        |
| Urea (mmol/L)                                     | 1936     | 7.2                | 10.7        | 8.3       | 0.3        | 5.3       | 8.4           | 14.0      | 78.3       |
| eGFR (ml/min/1.73 m2)                             | 2087     | 0.0                | 80.4        | 44.9      | 6.0        | 40.0      | 77.5          | 117.6     | 150.0      |
| Uric acid (μmol/L)                                | 1984     | 4.9                | 217.0       | 139.4     | 30.0       | 116.5     | 183.0         | 288.6     | 1175.8     |
| Sodium (mmol/L)                                   | 2030     | 2.7                | 140         | 5         | 116        | 137       | 140           | 143       | 158        |
| Potassium (mmol/L)                                | 2008     | 3.8                | 3.9         | 0.6       | 2.6        | 3.6       | 3.9           | 4.3       | 7.0        |
| Chloride (mmol/L)                                 | 2077     | 0.5                | 102         | 7         | 70         | 99        | 103           | 107       | 129        |
| Glycemia (mmol/L)                                 | 1958     | 6.2                | 7.9         | 2.7       | 0.1        | 6.2       | 7.4           | 9.1       | 26.9       |
| Lactate (mmol/L)                                  | 1647     | 21.1               | 1.71        | 1.51      | 0.06       | 0.98      | 1.30          | 1.90      | 16.00      |
| Arterial pH                                       | 1905     | 8.7                | 7.41        | 0.08      | 7.00       | 7.36      | 7.42          | 7.46      | 7.84       |
| Bicarbonates (mmol/L)                             | 1758     | 15.8               | 24          | 5         | 6          | 21        | 24            | 26        | 50         |
| Diuresis of 24 hours (ml/24h)                     | 1690     | 19.0               | 1652        | 1254      | 1          | 800       | 1388          | 2200      | 10000      |
| <b>Central Laboratory/Biomarkers at Inclusion</b> |          |                    |             |           |            |           |               |           |            |

|                                             |      |      |       |        |       |       |       |       |         |
|---------------------------------------------|------|------|-------|--------|-------|-------|-------|-------|---------|
| Soluble-ST2 (ng/mL)                         | 2063 | 1.1  | 520.0 | 455.5  | 3.5   | 182.3 | 345.6 | 765.1 | 2321.1  |
| Proenkephalin (pmol/L)                      | 2075 | 0.6  | 100.4 | 116.1  | 11.5  | 36.5  | 61.2  | 116.2 | 1398.6  |
| Bioactive-adrenomedullin (pg/mL)            | 2074 | 0.6  | 116.1 | 156.1  | 4.0   | 34.7  | 66.6  | 135.2 | 1926.1  |
| Galectin-3 (ng/mL)                          | 2076 | 0.5  | 27.4  | 20.1   | 5.2   | 14.2  | 21.0  | 33.0  | 114.0   |
| PCT (ng/mL)                                 | 2075 | 0.6  | 8.3   | 20.9   | 0.0   | 0.3   | 1.1   | 5.8   | 186.7   |
| IL-6 (pg/mL)                                | 2076 | 0.5  | 678.2 | 3622.4 | 1.5   | 43.5  | 100.9 | 261.7 | 50000.0 |
| CRP (mg/L)                                  | 2077 | 0.5  | 159.1 | 102.2  | 0.6   | 78.6  | 143.7 | 219.8 | 547.3   |
| NT-proBNP (pg/mL)                           | 2076 | 0.5  | 4828  | 8486   | 5     | 293   | 1202  | 4516  | 35000   |
| Troponin T (pg/mL)                          | 2076 | 0.5  | 306.6 | 1001.6 | 3.0   | 17.5  | 45.7  | 143.1 | 10000.0 |
| Cystatin-C (mg/L)                           | 2077 | 0.5  | 1.7   | 1.1    | 0.0   | 0.9   | 1.3   | 2.1   | 9.5     |
| NGAL (ng/mL)                                | 2041 | 2.2  | 428   | 613    | 1     | 97    | 209   | 509   | 7668    |
| Urinary Albumin (mg/L)                      | 2077 | 0.5  | 1088  | 1473   | 84    | 300   | 384   | 478   | 4000    |
| Urinary Cystatin-C (mg/L)                   | 1926 | 7.7  | 2.6   | 5.7    | 0.0   | 0.1   | 0.3   | 1.9   | 50.1    |
| Urinary NGAL (ng/mL)                        | 1927 | 7.7  | 454.9 | 564.5  | 0.9   | 38.8  | 135.4 | 740.8 | 1500.0  |
| Urinary L-FABP (ng/mL)                      | 1916 | 8.2  | 450.4 | 3160.2 | 0.1   | 10.3  | 31.6  | 92.0  | 64800.0 |
| <b>Disease Severity Scores at Admission</b> |      |      |       |        |       |       |       |       |         |
| APACHE II                                   | 971  | 53.5 | 22.29 | 7.67   | 3     | 17    | 23    | 28    | 42      |
| SOFA score                                  | 1518 | 27.3 | 8     | 4      | 0     | 5     | 8     | 10    | 22      |
| SAPS II                                     | 2086 | 0.0  | 50    | 19     | 0     | 36    | 49    | 63    | 110     |
| Glasgow Coma Scale                          | 1696 | 18.7 | 11    | 5      | 3     | 5     | 14    | 15    | 15      |
| Charlson Comorbidity Index                  | 1736 | 16.8 | 4     | 2      | 1     | 2     | 4     | 5     | 12      |
| <b>Novel Urinary Biomarker at Inclusion</b> |      |      |       |        |       |       |       |       |         |
| HF1-classifier                              | 1649 | 21.0 | -0.09 | 0.95   | -3.38 | -0.75 | -0.09 | 0.64  | 2.53    |
| HF2-classifier                              | 1649 | 21.0 | -0.06 | 0.59   | -2.21 | -0.45 | -0.06 | 0.33  | 2.22    |
| CAD238-classifier                           | 1649 | 21.0 | -0.34 | 0.26   | -1.06 | -0.51 | -0.39 | -0.21 | 0.95    |
| CKD273-classifier                           | 1686 | 19.2 | 0.44  | 0.39   | -1.11 | 0.21  | 0.56  | 0.73  | 1.19    |
| ACM128-classifier                           | 1624 | 22.2 | -0.27 | 0.69   | -1.98 | -0.76 | -0.35 | 0.16  | 2.39    |

**Table S1b. Categorical variables considered for inclusion in the prognostic models.**

|                                           | Missing (%) | n    | N    | %    |
|-------------------------------------------|-------------|------|------|------|
| <b>Demographics</b>                       |             |      |      |      |
| Male gender                               | 0           | 1361 | 2087 | 65.2 |
| <b>Diagnosis at Admission</b>             | 0           |      |      |      |
| Cardiac disease                           |             | 325  | 2086 | 15.6 |
| Acute neurological disorder               |             | 286  | 2086 | 13.7 |
| Acute respiratory failure                 |             | 394  | 2086 | 18.9 |
| Sepsis                                    |             | 536  | 2086 | 25.7 |
| Trauma                                    |             | 199  | 2086 | 9.5  |
| Other                                     |             | 346  | 2086 | 16.6 |
| <b>Admission Unit</b>                     | 0           |      |      |      |
| Cardiac Ward                              |             | 91   | 2087 | 4.4  |
| Emergency Room                            |             | 563  | 2087 | 27   |
| Home                                      |             | 206  | 2087 | 9.9  |
| Medical                                   |             | 9    | 2087 | 0.4  |
| Medical ICU                               |             | 95   | 2087 | 4.6  |
| Medical Ward                              |             | 274  | 2087 | 13.1 |
| Operating Room                            |             | 187  | 2087 | 9    |
| Scheduled Surgical                        |             | 51   | 2087 | 2.4  |
| Surgical ICU                              |             | 168  | 2087 | 8    |
| Surgical Ward                             |             | 219  | 2087 | 10.5 |
| Unscheduled Surgical                      |             | 47   | 2087 | 2.3  |
| Trauma                                    |             | 47   | 2087 | 2.3  |
| Other                                     |             | 130  | 2087 | 6.2  |
| <b>Status at Admission</b>                |             |      |      |      |
| Cardiac arrest before admission           | 0.2         | 178  | 2082 | 8.5  |
| Kidney Disease Improvement Global Outcome | 4.3         |      |      |      |
| 0                                         |             | 1485 | 1998 | 74.3 |
| 1                                         |             | 309  | 1998 | 15.5 |
| 2                                         |             | 133  | 1998 | 6.7  |
| 3                                         |             | 71   | 1998 | 3.6  |
| <b>Chronic treatments</b>                 |             |      |      |      |
| Oxygen at home                            | 0.9         | 29   | 2068 | 1.4  |
| Aldosterone antagonists                   | 0.9         | 14   | 2068 | 0.7  |
| Diuretics                                 | 0.9         | 449  | 2068 | 21.7 |
| Antiplatelets                             | 0.9         | 533  | 2068 | 25.8 |
| Calcium antagonist                        | 0.9         | 285  | 2068 | 13.8 |
| Inhaled steroids                          | 0.9         | 82   | 2068 | 4    |
| Psychiatric treatment                     | 0.9         | 457  | 2068 | 22.1 |
| Morphine                                  | 0.9         | 53   | 2068 | 2.6  |
| Insulin                                   | 0.9         | 118  | 2068 | 5.7  |

|                                                              |     |     |      |      |
|--------------------------------------------------------------|-----|-----|------|------|
| ACE Inhibitors or ARB                                        | 0.9 | 553 | 2068 | 26.7 |
| Cardiac glycosides                                           | 0.9 | 30  | 2068 | 1.5  |
| Nitrates                                                     | 0.9 | 15  | 2068 | 0.7  |
| Vitamin K Antagonists                                        | 0.9 | 173 | 2068 | 8.4  |
| Statins                                                      | 0.9 | 497 | 2068 | 24   |
| Beta-2 mimetics                                              | 0.9 | 104 | 2068 | 5    |
| Antidiabetics                                                | 0.9 | 222 | 2068 | 10.7 |
| Beta Blocker Non cardio selective                            | 0.9 | 155 | 2068 | 7.5  |
| Beta Blocker Cardio selective                                | 0.9 | 370 | 2068 | 17.9 |
| Amiodarone                                                   | 0.9 | 109 | 2068 | 5.3  |
| Immunosuppressive agents                                     | 0.9 | 60  | 2068 | 2.9  |
| Hydrocortisone                                               | 0.9 | 163 | 2068 | 7.9  |
| <b>CV Comorbidities</b>                                      |     |     |      |      |
| Chronic heart failure                                        | 0.2 | 153 | 2083 | 7.3  |
| Diabetes mellitus                                            | 0.2 | 384 | 2083 | 18.4 |
| Hypertension                                                 | 0.2 | 902 | 2083 | 43.3 |
| Prior myocardial infarction                                  | 0.2 | 83  | 2083 | 4    |
| Severe valvular disease or previous valvular surgery         | 0.2 | 82  | 2083 | 3.9  |
| Prior stroke                                                 | 0.2 | 92  | 2083 | 4.4  |
| Peripheral vascular disease including carotid artery disease | 0.2 | 209 | 2083 | 10   |
| Pulmonary embolism                                           | 0.2 | 58  | 2083 | 2.8  |
| Dyslipidemia                                                 | 0.2 | 412 | 2083 | 19.8 |
| Obesity                                                      | 0.2 | 227 | 2083 | 10.9 |
| Coronary artery disease                                      | 0.2 | 188 | 2083 | 9    |
| Atrial fibrillation flutter                                  | 0.2 | 221 | 2083 | 10.6 |
| Pulmonary hypertension                                       | 0.2 | 33  | 2083 | 1.6  |
| Congenital heart defect                                      | 0.2 | 11  | 2083 | 0.5  |
| Pacemaker                                                    | 0.2 | 54  | 2083 | 2.6  |
| Cardiac resynchronization therapy                            | 0.2 | 11  | 2083 | 0.5  |
| Prior Coronary Revascularization                             | 0.2 | 126 | 2083 | 6    |
| Cardiac Defibrillator                                        | 0.2 | 16  | 2083 | 0.8  |
| <b>Non-CV Comorbidities</b>                                  |     |     |      |      |
| COPD                                                         | 0.2 | 273 | 2083 | 13.1 |
| Chronic liver disease                                        | 0.2 | 158 | 2083 | 7.6  |
| Depression                                                   | 0.2 | 261 | 2083 | 12.5 |
| Dysthyroidism                                                | 0.2 | 140 | 2083 | 6.7  |
| Cognitive dysfunction                                        | 0.2 | 33  | 2083 | 1.6  |
| Smoking                                                      | 0.2 | 570 | 2083 | 27.4 |
| Alcohol                                                      | 0.2 | 365 | 2083 | 17.5 |
| Hemodialysis                                                 | 0.2 | 28  | 2083 | 1.3  |
| Chronic renal disease                                        | 0.2 | 241 | 2083 | 11.6 |
| Active recent malignant tumors                               | 0.2 | 281 | 2083 | 13.5 |
| Asthma                                                       | 0.2 | 93  | 2083 | 4.5  |

|                                             |     |      |      |      |
|---------------------------------------------|-----|------|------|------|
| Anemia                                      | 0.2 | 33   | 2083 | 1.6  |
| Chronic inflammatory disease                | 0.2 | 77   | 2083 | 3.7  |
| Loss of autonomy                            | 0.2 | 78   | 2083 | 3.7  |
| HIV                                         | 0.2 | 53   | 2083 | 2.5  |
| <b>Medications (Admission to Inclusion)</b> |     |      |      |      |
| Stockings compression                       | 0.3 | 521  | 2080 | 25   |
| Inotrope/vasopressor                        | 0.3 | 1490 | 2080 | 71.6 |
| RBC Transfusion                             | 0.3 | 476  | 2080 | 22.9 |
| Feeding Enteral                             | 0.3 | 1032 | 2080 | 49.6 |
| Hydrocortisone                              | 0.3 | 581  | 2080 | 27.9 |
| Renal Replacement Therapy                   | 0.3 | 219  | 2080 | 10.5 |
| ECMO                                        | 0.3 | 28   | 2080 | 1.3  |
| Feeding Parenteral                          | 0.3 | 363  | 2080 | 17.5 |
| Coronary revascularization                  | 0.3 | 37   | 2080 | 1.8  |
| Heparin                                     | 0.3 | 1577 | 2080 | 75.8 |
| Other device                                | 0.3 | 442  | 2080 | 21.2 |
| Vasodilator                                 | 0.3 | 196  | 2080 | 9.4  |
| Morphine                                    | 0.3 | 1539 | 2080 | 74   |
| Benzodiazepine                              | 0.3 | 1028 | 2080 | 49.4 |
| Neuromuscular blocking agents (curare)      | 0.3 | 720  | 2080 | 34.6 |
| Amiodarone                                  | 0.3 | 334  | 2080 | 16.1 |

ACE, angiotensin-converting enzyme; ARB, angiotensin receptor blocker; COPD, chronic obstructive pulmonary disease; ECMO, extracorporeal membrane oxygenation; HIV, human immunodeficiency virus; ICU, intensive care unit, RBC, red blood cells.

**Table S2. Centrally measured biomarkers at study inclusion considered in prognostic models.**

| <b>Biomarker</b>                                      | <b>Assay</b>                                           | <b>Function and clinical implication</b>                                                                                    |
|-------------------------------------------------------|--------------------------------------------------------|-----------------------------------------------------------------------------------------------------------------------------|
| <b><i>Plasma biomarkers included in model(s)</i></b>  |                                                        |                                                                                                                             |
| Bioactive-adrenomedullin (pg/mL)                      | Adrenomed GmbH, Hennigsdorf, Germany                   | vasodilatation, induction of angiogenesis, protection against oxidative stress and hypoxic injury: marker of myocyte stress |
| Galectin-3 (ng/mL)                                    | Abbott, Abbott Park, IL, USA                           | involve in inflammation, fibrosis and neoplastic transformation: marker of heart failure                                    |
| Interleukin-6 (pg/mL)                                 | Roche, Penzberg, Germany                               | pro-inflammation and anti-inflammation cytokine: marker of inflammation/infection                                           |
| Procalcitonin (ng/mL)                                 | Adrenomed GmbH, Hennigsdorf, Germany                   | precursor of calcitonin: marker of infection, mostly bacterial                                                              |
| Soluble-ST2 (ng/mL)                                   | Eurobio, Critical Diagnostics, San Diego, CA, USA      | involve in inflammation, fibrosis, and cardiac stress: marker of myocyte stress                                             |
| <b><i>Plasma biomarkers also considered</i></b>       |                                                        |                                                                                                                             |
| C-reactive protein (mg/L)                             | Abbott, Abbott Park, IL, USA                           | acute-phase protein: marker of inflammation/infection                                                                       |
| Cystatin-C (mg/L)                                     | Abbott, Abbott Park, IL, USA                           | protein derived by all nucleated cells, reabsorbed by proximal tubular cells: marker of decrease glomerular filtration rate |
| NGAL (ng/mL)                                          | Abbott, Abbott Park, IL, USA                           | involve in innate immunity: marker of renal tubular injury                                                                  |
| NT-proBNP (pg/mL)                                     | Roche Diagnostics GmbH, Mannheim, Germany              | biologically inactive segment of BNP: marker of myocyte stress                                                              |
| Proenkephalin (pmol/L)                                | Sphingotec GmbH, Hennigsdorf, Germany                  | endogenous opioid polypeptide hormone: marker of cardiovascular and cerebrovascular disease                                 |
| Troponin T (pg/mL)                                    | Abbott, Abbott Park, IL, USA                           | part of troponin complex, heart contraction: marker of myocyte injury                                                       |
| <b><i>Urinary biomarkers included in model(s)</i></b> |                                                        |                                                                                                                             |
| Proteomic Classifier: ACM128                          | Mosaiques Diagnostics, Hanover, Germany                | consist of 128 urinary peptide fragments                                                                                    |
| Proteomic Classifier: CKD273                          | Mosaiques Diagnostics, Hanover, Germany                | consist of 273 urinary peptide fragments: marker of early fibrosis of the kidney                                            |
| Proteomic Classifier: HF1                             | Mosaiques Diagnostics, Hanover, Germany                | consist of 85 urinary peptide fragments: marker of left ventricular dysfunction                                             |
| <b><i>Urinary biomarkers also considered</i></b>      |                                                        |                                                                                                                             |
| Urinary Albumin (mg/L)                                | Abbott, Abbott Park, IL, USA                           | involve in glomerular injury: marker of renal glomerular injury                                                             |
| Urinary Cystatin-C (mg/L)                             | Abbott, Abbott Park, IL, USA                           | protein derived by all nucleated cells, reabsorbed by proximal tubular cells: marker of renal tubular injury                |
| Urinary L-FABP (ng/mL)                                | Nordia L-FABP; Sekisui Medical Co., Ltd., Tokyo, Japan | involve in renal tubulointerstitial damage: marker of renal tubular injury                                                  |
| Urinary NGAL (ng/mL)                                  | Abbott, Abbott Park, IL, USA                           | involve in innate immunity: marker of renal tubular injury                                                                  |
| Proteomic Classifier: CAD238                          | Mosaiques Diagnostics, Hanover, Germany                | consist of 238 urinary peptide fragments: marker of cardiovascular disease                                                  |
| Proteomic Classifier: HF2                             | Mosaiques Diagnostics, Hanover, Germany                | consists of 671 urinary peptide fragments: marker of left ventricular dysfunction                                           |

**Figure S1. Calibration Plots for Multivariable Logistic Regression and Cox Proportional Hazards Models for A) In-ICU Mortality, B) In-Hospital Mortality, and C) 1-Year Survival. Results are presented for the first multiple imputation dataset.**

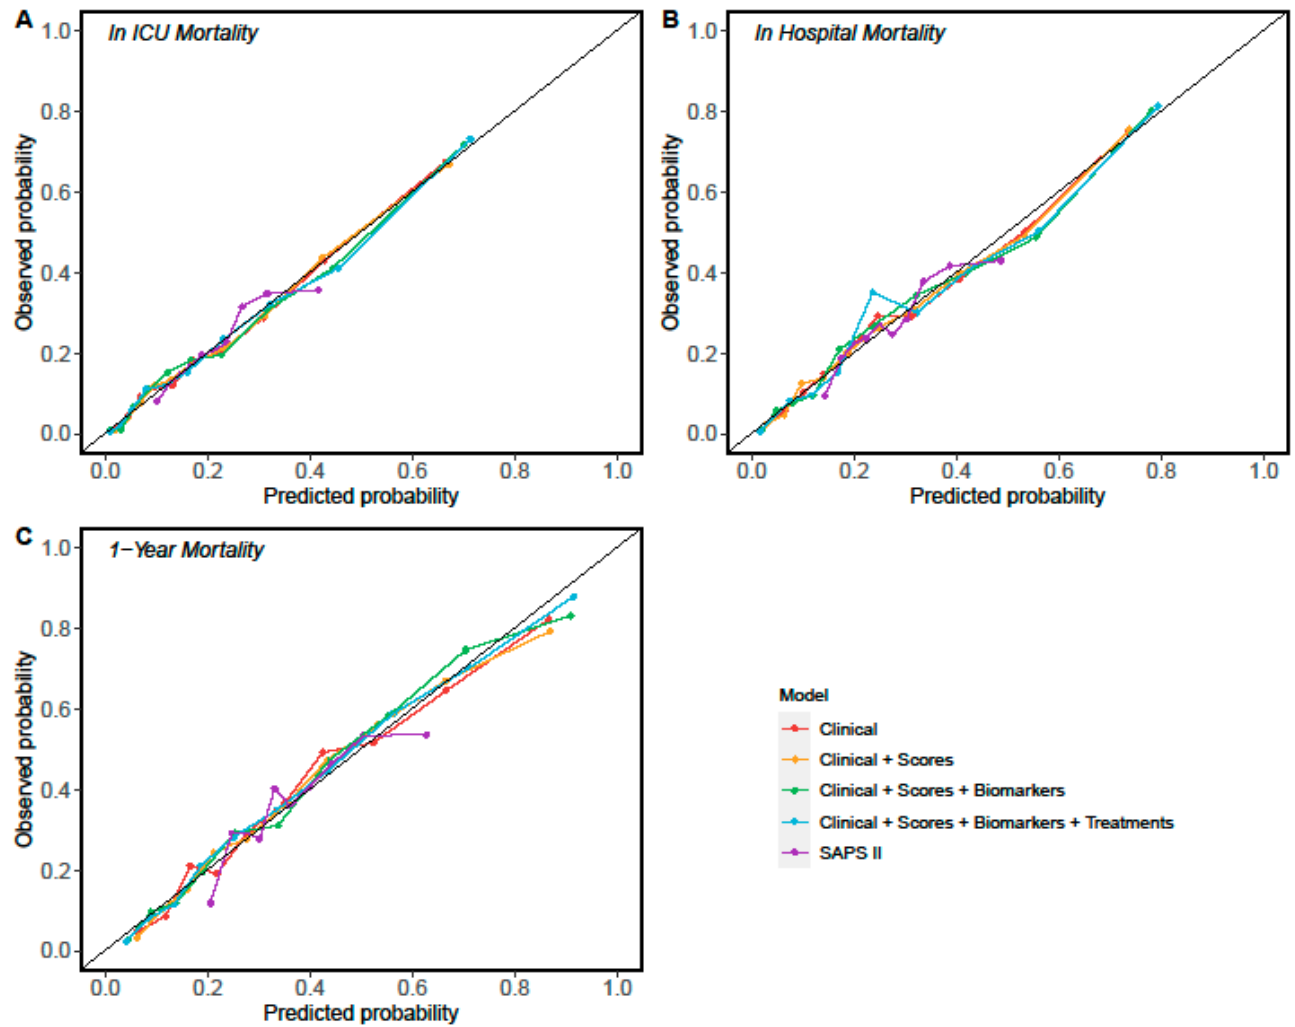



**Figure S2. Receiver Operating Characteristic Curves for Multivariable Logistic Regression Models for A) In-ICU Mortality, B) In-Hospital Mortality, and C) 1-Year Survival.** Results are presented for the first multiple imputation dataset.

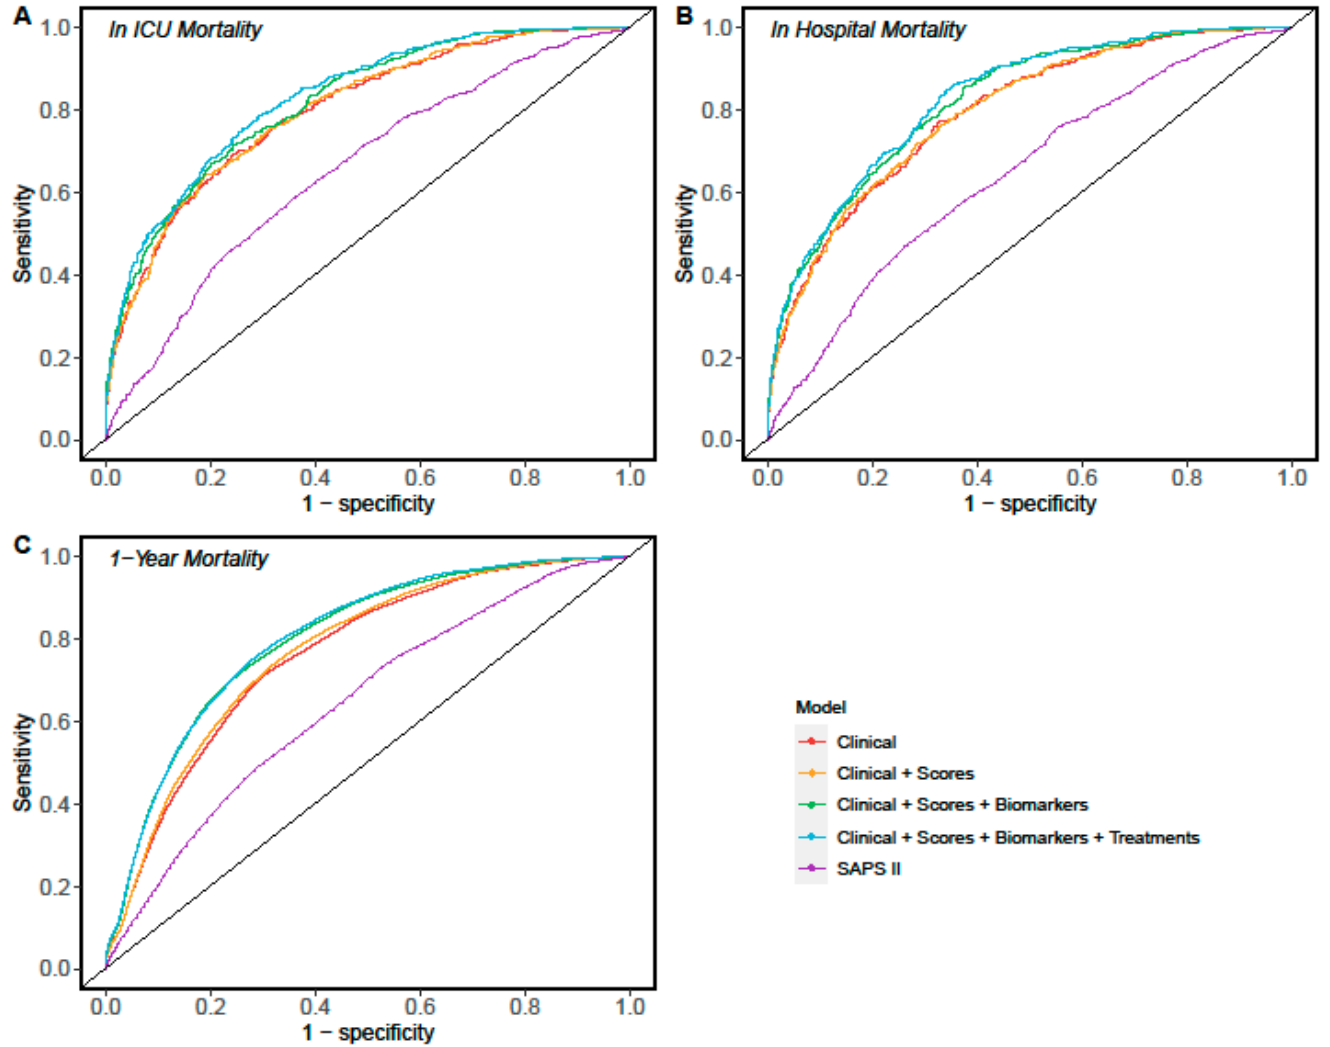

Supplement: s1 [file s1]
